# Supplementary material for: Molecular Profile of Important Genes for Radiogenomics in the Amazon Indigenous Population
Source: MDPI journal article supplement (doi:10.3390/jpm14050484), 2024-04-30
Supplement: s1 [file s1]

SUPPLEMENTARY TABLE 1

| Gene  | dbSPN       | Impact | Region                    |     |     | INDG   |
|-------|-------------|--------|---------------------------|-----|-----|--------|
| TANC1 | rs2288110   | LOW    | SYNONYMOUS_CODING         | SNV | A>C | 0.9211 |
| TANC1 | rs3821296   | LOW    | SYNONYMOUS_CODING         | SNV | A>G | 0.9375 |
| TANC1 | rs4664276   | LOW    | SYNONYMOUS_CODING         | SNV | C>T | 0.9375 |
| XRCC4 | rs1056503   | LOW    | SYNONYMOUS_CODING         | SNV | T>G | 0.6905 |
| MEG3  | rs151191249 | LOW    | SPLICE_SITE_REGION+INTRON | SNV | G>C | 0.2266 |
| PRKCE | rs1143692   | LOW    | SYNONYMOUS_CODING         | SNV | C>T | 0.0000 |
| TANC1 | rs2288105   | LOW    | SPLICE_SITE_REGION+INTRON | SNV | C>T | 0.0800 |
| PRKCE | rs1143691   | LOW    | SYNONYMOUS_CODING         | SNV | C>T | 0.2581 |

---

| AFR   | AMR   | EAS   | EUR   | SAS   |
|-------|-------|-------|-------|-------|
| 0.351 | 0.601 | 0.615 | 0.372 | 0.535 |
| 0.349 | 0.602 | 0.616 | 0.372 | 0.535 |
| 0.395 | 0.604 | 0.616 | 0.372 | 0.535 |
| 0.476 | 0.333 | 0.706 | 0.140 | 0.172 |
| 0.004 | 0.052 | 0.017 | 0.015 | 0.004 |
| 0.004 | 0.052 | 0.007 | 0.069 | 0.077 |
| 0.182 | 0.261 | 0.455 | 0.084 | 0.171 |
| 0.006 | 0.121 | 0.396 | 0.095 | 0.238 |

---

SUPPLEMENTARY TABLE 2

| Gene  | dbSPN       | Frequencies |            |            |            |            |
|-------|-------------|-------------|------------|------------|------------|------------|
|       |             | INDG x AFR  | INDG x AMR | INDG x EAS | INDG x EUR | INDG x SAS |
| TANC1 | rs2288110   | 2.08E-21    | 9.95E-04   | 2.47E-08   | 5.41E-20   | 6.12E-12   |
| TANC1 | rs3821296   | 5.98E-23    | 4.36E-10   | 1.97E-09   | 1.60E-21   | 3.04E-13   |
| TANC1 | rs4664276   | 3.68E-20    | 4.36E-10   |            | 1.60E-21   | 3.04E-13   |
| XRCC4 | rs1056503   | 1.93E-03    | 1.03E-07   |            | 2.11E-18   | 3.52E-16   |
| MEG3  | rs151191249 | 4.24E-08    | 2.58E-04   | 3.27E-07   | 3.27E-07   | 4.24E-08   |
| PRKCE | rs1143692   |             | 2.28E-02   |            | 6.36E-03   | 3.12E-03   |
| TANC1 | rs2288105   | 3.68E-02    | 4.12E-04   | 3.16E-11   |            |            |
| PRKCE | rs1143691   | 2.00E-09    | 1.09E-02   | 3.59E-02   | 1.81E-03   |            |
